# Supplementary material for: Assessing the accuracy of binding pose prediction for kinase proteins and 7-azaindole inhibitors: a study with AutoDock4, Vina, DOCK 6, and GNINA 1.0
Source: Royal Society of Chemistry journal article supplement (doi:10.1039/d5ra05526a), 2025-01-01
Supplement: d5ra05526a1.xlsx [file d5ra05526a1.xlsx]

## Sheet: bindingpose_csv
PDB	Ligand	SMILES
1ZYS	199	CN1CCN(C2CCC(C3CNC4NCC(NC(O)C5CCCNC5)C4C3)CC2)CC1
2QD9	LGF	COC1NC2NCC(C(O)C(O)N3CC[C@@H](O)C3)C2C[C@H]1[C@H](O)N1CCN2C(CN[C@H]2[C@@H]2CC[C@@H](F)C[C@H]2F)C1
2QHM	7CS	CN1[C@@H]2CC[C@H]1C[C@@H](OC(O)C1CN[C@H]3NCCCC13)C2
2QOH	P3Y	COC1CCCCC1C1CNC2NCC(C3CNCC(C(O)N(C)C)C3)CC21
2UVX	GVH	C1CNC2NCCC2C1
2Z60	P3Y	COC1CCCCC1C1CNC2NCC(C3CNCC(C(O)N(C)C)C3)CC21
3BHT	MFR	COC1CCNC2NC[C@H]([C@@H]3CCNC(N)N3)[C@H]21
3BHU	MHR	CCCOC1CCNC2NC[C@H]([C@@H]3CCNC(N)N3)[C@H]21
3C4C	324	CCCS(O)(O)NC1CCC(F)C([C@H](O)C2CNC3NCC(Cl)CC32)C1F
3C4E	C4E	C1CCC(NC2CNC3NCCCC23)CC1
3C4F	C4F	CO[C@H]1CCCC(CC2CNC3NCCCC23)C1
3CE3	1FN	OC(NC1CCC(OC2CCNC3NCCC32)C(F)C1)C1CCCN(C2CCC(F)CC2)C1O
3CTJ	320	OC(NC1CCC(OC2CCNC3NCCC32)C(F)C1)N[C@@H](O)CC1CCC(F)CC1
3DJ6	AK6	COC1CCC(C(O)NC2CCCCC2)CC1NC(O)CCSCC1CNC2NCCC2C1
3DK3	SX7	CCN1NCCC1C1CNC2NCC(C3CCC(N)C(C(O)N(C)C)C3)CC21
3DK6	SX7	CCN1NCCC1C1CNC2NCC(C3CCC(N)C(C(O)N(C)C)C3)CC21
3DK7	SX7	CCN1NCCC1C1CNC2NCC(C3CCC(N)C(C(O)N(C)C)C3)CC21
3E87	G95	NC[C@@H](NC(O)C1CCC(C2CCNC3NCCC32)S1)C1CCCCC1
3EN4	KS1	NC1NCNC2C1C(C1CNC3NCCC3C1)NN2C1CCCC1
3ETA	351	NCC1CCC(C2CNC3NCC(C4CCCC(NC(O)NC5CCCCC5OC5CCCCC5)C4)C3C2)CC1
3FQH	057	CN1CC(C2CC3CCCNC3N2)C2CC(C(O)NC(C)(C)CO)CCC21
3GFW	S22	OCCOCCOCCOCCO.OCCOCCOCCOCCOCCO
3GQL	GQL	COC1CCCC([C@H](O)[C@H]2CNC3NCC[C@H](C4CC(F)CC(F)C4)C32)C1
3HDM	MMG	OC(O)C1CCC(C2CNC3NCC(C4CCCCC4)CC32)CC1
3HDN	GMG	OC(O)CC1CCC(C2CNC3NCC(C4CCC5CCCCC5C4)CC32)CC1
3JY9	JZH	OC1CCC([C@@H]2[C@H](O)NC3CCCC[C@H]3[C@H]3CCNC4NC[C@H]2C43)CC1
3LVP	PDR	COC1CC2C(NC1OC)C(C1CC3C(Cl)CCNC3N1)CN2C
3OG7	324	CCCS(O)(O)NC1CCC(F)C(C(O)C2CNC3NCC(C4CCC(Cl)CC4)CC32)C1F
3RCJ	3RC	C1CCC(CN2CC(C3CNC4NCCCC43)NN2)CC1
3VS7	KS1	NC1NCNC2C1C(C1CNC3NCCC3C1)NN2C1CCCC1
3ZCL	5TF	CC(C)NC1CCC2NNC([C@@H](C)C3CNC4NCCCC43)N2N1
3ZLS	92P	COC(O)C1CNC2NCCCC21
4AOI	4K0	NCC1CCC(C2CNC3NNC(CC4CNC5NCCCC45)N3N2)CC1
4AWI	AQ2	CC(C)C1CC2C(NCCC2C2CCC(S(O)(O)NC3CCS(O)(O)CC3)CC2)N1
4BIC	IE4	NCCNS(O)(O)C1CCC(C2CNC3NCCCC32)S1.NCCNS(O)(O)C1CC[C@H](C2CNC3NCCCC32)S1
4BID	IE8	NC[C@H](O[C@@H]1CNC(C2CCOC2)C(C2CN[C@H]3NCCC[C@@H]23)C1)C1CCCCC1
4BIE	IE6	CC1C[C@@H]2C(NCC[C@@H]2C2CCC(S(O)(O)NCCN)S2)N1
4FK3	325	CCS(O)(O)NC1CCC(F)C(C(O)C2CNC3NCC(C4CCCNC4)CC32)C1F
4FV9	E71	[H]C1NC([H])C([H])C([C@H]2C([H])NC3C(C(C4ONC([H])C4C4C([H])C([H])C([H])C(F)C4F)C([H])N3[H])C2[H])C1[H]
4GU6	10N	CN(C1NCCCC1CNC1C(CN)CNC2NC(C3CCCCC3)CC21)S(C)(O)O
4HVS	647	FC(F)(F)C1CCC(CN[C@H]2CCC(CC3CNC4NCCCC34)CN2)CC1
4HW7	64M	COC1CNC2NCC(CC3CCC(NCC4CCC(C(F)(F)F)CC4)NC3)C2C1
4IQ6	IQ6	ClC1C[C@@H]([C@H]2CNC3NCCCC32)C[C@@H](NC2CCCCC2)N1
4JG7	1LC	[H]C1CC([H])C2C(C(O)C3C([H])C([H])C([H])C(C([H])[C@]([H])(CN)C(O)N([H])[H])C3[H])C([H])N([H])C2N1
4JOA	3DK	CN1CC(C2CNC3NCC(C4CNN(CC5CC(F)CCC5F)C4)C3C2)CN1
4K1B	1OC	OC(NC1CNC2NCC(C3CCCCC3F)CC12)C1CNN2CCC(NC[C@H]3CCNC[C@@H]3F)NC12
4O91	NG2	CCN1CCN(CC2CC[C@@H](NC(O)C3CCC(C)[C@H](OC4CCNC5NCCC54)C3)CC2C(F)(F)F)CC1
4P90	2K0	OCC1CCC(Cl)[C@H](C(O)C2CNC3NCC(C4CNN(C5CCNCC5)C4)C[C@H]32)C1
4QMW	KS1	NC1NCNC2C1C([C@H]1CNC3NCCC3C1)NN2C1CCCC1
4R7H	P31	FC(F)(F)C1CCC(CNC2CCC(CC3CNC4NCC(Cl)CC34)CN2)CN1
4RZV	324	CCCS(O)(O)NC1CCC(F)C(C(O)C2CNC3NCC(C4CCC(Cl)CC4)CC32)C1F
4WAF	3K6	C[C@@H]1CN2NC[C@@H](C3CCC(S(O)(O)N(C)C)CC3)C2CN1[C@@H]1CCNC2NCCC21
4WO5	324	CCCS(O)(O)NC1CCC(F)C(C(O)[C@H]2CNC3NCC(Cl)CC32)[C@H]1F
4XP0	42A	NCC1CNC2NCCCC12
4XV1	904	CCN(C)S(O)(O)NC1CCC(F)C(C(O)C2CNC3NCC(C4CNC(C5CC5)NC4)CC32)C1F
4XV9	1OO	OC(C1CNC2NCC(Cl)CC21)[C@@H]1C(F)CC[C@H](NS(O)(O)C2CCC(C(F)(F)F)CC2)C1F
4Y85	499	NC1NNC([C@H]2CNC3NCC(C4CNC5CCCCC54)C[C@H]32)O1
4YTF	4HZ	C[C@H](NC1NC([C@@H]2CNC3NCC(Cl)CC32)NCC1F)[C@H](O)NCC(F)(F)F
4YTH	467	CC(C)(NC1N[C@@H](C2CNC3NCC(Cl)C[C@H]32)NCC1F)C(O)NCC(F)(F)F
4YTI	VJK	CC[C@@](C)(N[C@H]1CCN[C@H]([C@@H]2CN[C@@H]3NCCC[C@@H]32)N1)[C@H](O)NCC(F)(F)F
4YUQ	KS1	N[C@H]1NCNC2[C@H]1C(C1CNC3NCCC3C1)NN2C1CCCC1
5GJD	6V3	CN1CCN(C2CCCC3CC(NC(O)NC4CCC(OC5CCNC6NCCC65)CC4)CCC32)CC1
5HES	032	CCCS(O)(O)N[C@H]1CC[C@@H](F)[C@@H](C(O)[C@@H]2CNC3NCC(C4CCC(Cl)CC4)CC32)C1F
5HKM	61Y	CCC1C[C@@H](C2CNC3NCC(C4CNNC4)CC32)NC(N)N1
5HO8	63E	CCCC[C@@H]1C[C@@H]([C@@H]2CNC3NCCCC32)NC(N)N1
5JRQ	6N9	[H]C([H])OC1C([H])C([H])C(C2C([H])NC3NC([H])C(C(O)C4C(F)C([H])C([H])C(N([H])S(O)(O)C([H])([H])C([H])([H])C([H])([H])[H])C4F)C3C2[H])C([H])C1[H]
5JSM	6NB	CCCS(=O)(=O)NC1=C(C(=C(C=C1)F)C(=O)C2=CNC3=C2C=C(C=N3)C4=CC=C(C=C4)OCCOCCOCCOC5=CC=C(C=C5)C6=CC7=C(NC=C7C(=O)C8=C(C=CC(=C8F)NS(=O)(=O)CCC)F)N=C6)F
5JT2	6NC	[H]C1NC2NC([H])C(C(O)C3C(F)C([H])C([H])C(N([H])S(O)(O)C([H])([H])C([H])([H])C([H])([H])[H])C3F)C2C([H])C1C1C([H])C([H])C(C([H])([H])N([H])C(O)C([H])([H])OC([H])([H])C(O)N([H])C([H])([H])C2C([H])C([H])C(C3C([H])NC4NC([H])C(C(O)C5C(F)C([H])C([H])C(N([H])S(O)(O)C([H])([H])C([H])([H])C([H])([H])[H])C5F)C4C3[H])C([H])C2[H])C([H])C1[H]
5KBR	IPW	OC(C1CCC(Cl)CC1)[C@H]1CNC2NCC(C3CNN(C4CCNCC4)C3)CC21
5L4Q	LKB	[H]C1NC([H])C(C(O)N([H])C2C3C([H])C(C4C([H])C([H])C(CN)C([H])C4[H])C([H])NC3N([H])C2[H])C([H])C1[H]
